1 **Polygenic prediction of the phenome, across ancestry, in emerging adulthood**

2

3 Anna R. Docherty, Ph.D.<sup>\*1,2</sup>, Arden Moscati, Ph.D.<sup>\*2</sup>, Danielle Dick, Ph.D.<sup>3-5</sup>, Jeanne E. Savage, Ph.D.<sup>2</sup>, Jessica E.  
4 Salvatore, Ph.D.<sup>2,3</sup>, Megan Cooke, Ph.D.<sup>2</sup>, Fazil Aliev, Ph.D.<sup>3,6</sup>, Ashlee A. Moore, M.A.<sup>2</sup>, Alexis C. Edwards,  
5 Ph.D.<sup>2</sup>, Brien P. Riley, Ph.D.<sup>2</sup>, Daniel E. Adkins, Ph.D.<sup>1,7</sup>, Roseann Peterson, Ph.D.<sup>2</sup>, Bradley T. Webb, Ph.D.<sup>2</sup>,  
6 Silviu A. Bacanu, Ph.D.<sup>2</sup>, Kenneth S. Kendler, M.D.<sup>2</sup>

7

8 RUNNING HEAD: Genome-Phenome Prediction in Emerging Adulthood

9

- 10 1. Departments of Psychiatry & Human Genetics, University of Utah School of Medicine, Salt Lake City, UT,  
11 USA
- 12 2. Virginia Institute for Psychiatric and Behavioral Genetics, Virginia Commonwealth University School of  
13 Medicine, Richmond, VA, USA
- 14 3. Department of Psychology, Virginia Commonwealth University, Richmond, VA, USA
- 15 4. Department of Human & Molecular Genetics, Virginia Commonwealth University, Richmond, VA, USA
- 16 5. College Behavioral and Emotional Health Institute, Virginia Commonwealth University, Richmond, VA, USA
- 17 6. Department of Business, Karabuk University, Turkey
- 18 7. Department of Sociology, University of Utah, Salt Lake City, UT, USA

19

20 \*Both authors contributed equally to the manuscript.

21 †Corresponding author: Departments of Psychiatry and Human Genetics, University of Utah School of Medicine,  
22 501 Chipeta Way, Salt Lake City, Utah, USA. Tel. +1 763 516 7367, fax. +1 804 828 1471, email:  
23 [anna.docherty@utah.edu](mailto:anna.docherty@utah.edu)

24

25 Article word count: 3,540 (excluding title page, abstract, references, figure captions, tables, author contributions,  
26 and financial disclosures)

27

28

### Abstract

29

**Background:** Identifying genetic relationships between complex traits in emerging adulthood can provide useful etiological insights into risk for psychopathology. College-age individuals are under-represented in genomic analyses thus far, and the majority of work has focused on clinical disorder or cognitive abilities rather than normal-range behavioral outcomes.

33

**Methods:** This study examined a sample of emerging adults 18-22 years of age (N = 5,947) to construct an atlas of polygenic risk for 33 traits predicting real-world outcomes. Twenty-eight hypotheses were tested based on the previous literature on samples of European ancestry, and the availability of rich assessment data allowed for polygenic predictions across 55 psychological and medical phenotypes.

37

**Results:** Polygenic risk for schizophrenia in emerging adults predicted anxiety, depression, nicotine use, trauma, and family history of psychological disorders. Polygenic risk for neuroticism predicted anxiety, depression, phobia, panic, neuroticism, and risk for cardiovascular disease.

40

**Conclusions:** These results calcify unique links between genetic risk for schizophrenia, neuroticism, substance use, and important health factors in healthy early adulthood, and demonstrate cross-ancestry replication of these genetic relationships.

43

44

Keywords: phenome; genetic; polygenic; schizophrenia; neuroticism; cardiovascular

45  
46  
47  
48  
49  
50  
51  
52  
53  
54  
55  
56  
57  
58  
59  
60  
61  
62  
63  
64  
65  
66  
67  
68  
69  
70  
71  
72

## Introduction

Broad phenotyping can greatly enhance our understanding of the underlying structure of genetic vulnerability to psychiatric disorders. Recent genome-wide polygenic risk research has utilized a range of clinical traits (the “phenome”) (Bulik-Sullivan *et al.* 2015; Krapohl *et al.* 2015; Hagenaars *et al.* 2016). This approach uses published summary statistics from large genome-wide association studies to calculate genome-wide polygenic scores (GPS) for many major disorders and clinically relevant traits. These scores are then used to predict a number of potentially informative psychiatric, psychological and physical health phenotypes. In conjunction with psychiatric genomic cross-disorder research (Cross-Disorder Group of the Psychiatric Genomics Consortium, 2013) examining the co-heritability of major psychiatric disorders (e.g., Docherty *et al.* 2016), this appears to be a promising method for elucidating a genetic framework for psychiatric disorders and discovering unexpected genotype-phenotype associations. However, previous research has not included GPS of eating, anxiety, and inflammatory disorders, personality, lipid levels and puberty traits in the prediction of outcome phenotypes (which have frequently focused on cognitive abilities) and has not examined samples between the ages of 17 and 35, the key age brackets of emerging and young adulthood.

This study applied such an approach to GPS (33 total) in a substantial genetic study of emerging adulthood outcomes. Emerging adulthood, a period starting at the age of 18 when adolescents begin to develop the roles and independence of adulthood, reflects a high-risk age range for the onset of many psychiatric and substance use disorders, including schizophrenia, affective disorders, anxiety disorders and alcohol and drug use disorders. Data from the National Comorbidity Survey Replication sample indicate that three quarters of all lifetime cases of DSM-IV diagnoses start by age 24 (Kessler *et al.* 2005), and WHO's World Mental Health data indicates that approximately three quarters of lifetime psychiatric disorders begin by the mid-20's (Kessler *et al.* 2007).

The University Student Survey (called “Spit for Science”, or S4S) was developed to identify risk factors for onset of mental health disorders with large-scale studies of genetic, environmental, and developmental influences. Discovery summary statistics from 33 genome-wide association studies (GWAS) were used to derive GPSs in this large sample of young adults (N = 5,947) across a range of psychiatric, psychological, and physical health traits (Table S1 in online supplementary materials). Expanding on previous research, twenty-eight hypotheses of genetic prediction were tested based on selected studies in past literature. Further, the availability of rich clinical assessment

73 data allowed for the calculation of polygenic predictions across a greater number of outcomes than has ever been  
74 studied previously, many of which were completely novel in phenomic studies. These included 55 psychiatric,  
75 psychological and medical phenotypes (listed in Table S2 in the online supplementary material).

76 Moreover, the GPS metrics were powerful enough to examine relationships across subsamples of different  
77 ancestries. While GWAS approaches require thousands of individuals to locate “hits,” continuous polygenic scores  
78 require far smaller samples for adequate power. This sample was suitably diverse in ancestry to map the GPS-  
79 phenotype in young adults of European ancestry (EUR, N=3,016) and then to replicate these findings and GPS-GPS  
80 correlations across non-European ancestry groups including of African origin (AFR, N=1,339), native American  
81 origin (AMR, N=581), and East Asian (EAS, N=557), and South Asian origin (SAS, N=454). Separate association  
82 matrices were created for the empirically categorized AFR, AMR, EAS, and SAS samples and are provided here and  
83 in the supplemental figures available online.

84 We can learn a lot from the study of emerging adults over and above adolescent samples, as early  
85 behavioral patterns that may precede adult psychopathology can be studied, and new hypotheses about critical  
86 exposures and environmental risk factors can emerge. The results presented here reflect a polygenic modeling  
87 framework in a large young adult sample, and provides evidence that the integration of phenotypic and genotypic  
88 data will be useful in the prediction of negative health outcomes in emerging adults.

89

90

## Methods

### 91 Sample Ascertainment and Phenotyping

92 Phenome-wide behavioral data (N=7,592) were drawn from young adults from the first three cohorts in  
93 S4S, samples drawn from a large urban university in the Mid-Atlantic United States, which included 5,947 unrelated  
94 individuals with genome-wide genotypes (Dick *et al.* 2014). The S4S sample does not overlap with any of the  
95 discovery GWAS samples used in these analyses. Details of participant ascertainment have been published  
96 elsewhere (Dick *et al.* 2014) but briefly, emerging adults ages 18-22 were recruited from a mid-sized university in  
97 the eastern United States, across multiple cohorts, for a campus-wide study of genetic and environmental factors  
98 contributing to alcohol and substance use. The protocol was approved by the university Institutional Review Board,  
99 and carried out in accordance with the provisions of the World Medical Association Declaration of Helsinki.

100 Participants were 61.1% female with a mean age of 18.59 at first assessment. Representativeness of this sample is

101 strong and has been reported elsewhere (Dick *et al.* 2014). Assignment to ancestry group was empirically based on  
102 greatest similarity to 1000 Genomes Phase 3 super-populations. The present analyses included 55 traits from the  
103 domains of psychopathology, personality, health factors, and educational achievement (Table S2 in the online  
104 supplementary materials). All analyses included age, sex, and 10 ancestry principal components as covariates.  
105 Variables assessed at multiple occasions or in multiple cohorts were adjusted for number of assessments and cohort  
106 group. Sample sizes for each of the phenotypic measures are also provided in Table S2.

### 107 **Genetic Risk Scoring**

108 DNA collection, calling, and imputation is detailed elsewhere (Dick *et al.* 2014). We processed genotypes  
109 using standard quality control procedures followed by imputation of SNPs using the 1000 Genomes Project  
110 reference panel. After imputation and quality control, we included approximately 2.3 million variants into the  
111 polygenic scoring analyses. A GPS for each discovery phenotype was calculated using the summary statistics we  
112 obtained from 33 GWAS (Table S1 in the online supplementary materials). Python-based LDpred (Vilhjálmsón *et al.*  
113 *al.* 2015) was used for these analyses because of its ability to account for linkage disequilibrium (LD) structure  
114 (Krapohl *et al.* 2015) using our own large EUR test sample, and its use of all genetic variants (lack of specified p-  
115 value threshold for inclusion of the genetic variants in the GPS). LDpred allows for the modeling of LD based on  
116 LD in the discovery sample to weight the relative contributions of syntenic variants to the outcome phenotype.  
117 LDpred uses postulated proportions of causal variants in the genome as Bayesian prior probabilities for GPS  
118 calculations, and we tested a range of different priors (proportions of 0.3, 0.1, 0.03, 0.01, 0.003, and 0.001), as well  
119 as the model of infinite variants of infinitesimally small effect (Fisher, 1919) to construct scores.

### 120 **Phenotype Prediction**

121 A flowchart depicting the GPS-phenome cross-ancestry prediction and GPS-GPS correlation procedure is presented  
122 in Figure 1. Regressions were run using R to compare full (GPS, ten ancestry principal components, age, sex,  
123 cohort, and number of measurements when applicable) and restricted models where GPS was removed. Prior to the  
124 global analyses, a set of *a priori* hypotheses, gathered from previous research, were tested (Table 1). We elected to  
125 forgo experimental binning (into quantiles, for example) in order to minimize the number of exploratory analyses  
126 beyond regressions of GPS on the phenotypes. Multiple testing was corrected for using a False Discovery Rate  
127 (FDR) of 5% (Benjamini & Hochberg, 1995) within each ancestry group using the `p.adjust` function in R; the FDR  
128 is appropriate for an analysis designed to evaluate the pattern of relationships between many constructs because it

129 treats each combination of discovery phenotype, outcome, and LDpred prior level as an independent test. It should  
130 be noted that this multiple testing correction was conservative, not accounting for previously established  
131 associations or correlations between multiple prior levels tested in the same discovery phenotypes, to filter out any  
132 potentially spurious results.

### 133 **Cross-Disorder GPS Partial Correlations and GPS-GPS Replication Hypotheses Across Ancestry**

134 In addition to testing the GPSs prediction of the phenotypes, GPSs were also examined for correlations  
135 with each other in all ethnicities. These provide different results than genetic correlation estimates, but are intended  
136 to demonstrate that GPS scores are not independent, and that variance attributable to a particular discovery  
137 phenotype may be partially shared with another. This sharing may be due to common genetic factors between  
138 phenotypes, possible sample overlap, and error variance. GPS correlations have been previously reported in EUR,  
139 but this analysis added phenotypes such as cardiovascular and triglyceride factors. Correlation coefficients,  $p$ -values,  
140 and  $q$ -values (after correcting the  $p$ -values for the FDR of 5%) were derived for GPS partial correlations using R and  
141 adjusting for the ancestry principal components. We chose to use partial correlations in order to standardize the  
142 weights across phenotype and provide more direct comparisons of statistics for plotting purposes. Based on the  
143 cross-disorder psychiatric genomics findings to date (Bulik-Sullivan *et al.* 2015), we hypothesized significant GPS  
144 associations between schizophrenia (SZ) and bipolar disorder (BP), SZ and autism (AUT), SZ and major depressive  
145 disorder (MDD), BP and MDD, and AUT and attention deficit hyperactivity disorder (ADHD) across each of the  
146 ancestry groups (see Table 2).

147

## 148 **Results**

### 149 **Genetic Profile Score-Phenotype Prediction**

#### 150 *A Priori* Replication Analyses

151 We evaluated previous cross-phenotype predictions based on recent work—for example, that age at  
152 menarche had an inverse association with obesity/body mass index (Bulik-Sullivan *et al.* 2015). We tested several  
153 hypotheses in the European group, in order to maximize sample size without introducing potential population  
154 stratification. Multiple testing correction (FDR) was very conservative; again, we corrected uniformly for the total  
155 number of tests. This was to filter out any potentially spurious results. Of the 28 predictions tested, 22 showed  
156 effects in the expected direction ( $p=0.002$ , one-tailed sign test), and 7 were significant after stringent multiple-

157 testing correction. Two previous notable null associations, MDD GPS predicting Grade Point Average (GPA), and  
158 Type 2 Diabetes GPS predicting GPA, were also null in our sample. Full results are presented in Table 1, including  
159 additional associations with the listed GPS phenotypes.

#### 160 Phenome-Wide Prediction

161 We also performed hypothesis-free analyses across all 33 GPS and 55 S4S phenotypes to explore  
162 potentially novel associations. Multiple prior proportions of causal variants in the genome were tested, as detailed in  
163 Methods. Figure 2 presents notable results for GPS prediction of phenotypes in the European group for the prior  
164 proportion of 0.3 (that is, an initial assumption that 30% of the genome is associated with the GPS phenotype). The  
165 0.3 prior level showed stronger prediction in past work (Krapohl *et al.* 2015), and corresponds to a plausible  
166 assumption about the genetic architecture of many complex traits, due to instances of increasing sample size of  
167 GWAS proportionally increasing numbers of associated loci. In this group and prior proportion level, out of 1,815  
168 associations 35 were suggestively significant at  $q < 0.16$  (the  $P$ -value threshold corresponding to Akaike Information  
169 Criterion (Akaike, 1974)), 11 more were significant at  $q < 0.05$ , and 26 additional associations were robust at  $q < 0.01$ .  
170 An additional 53 associations showed at least suggestive significance at other prior levels. A heatmap of analyses at  
171 multiple assumed prior proportions of causal variants can be found in Figure 2 (EUR; and for replications in all  
172 ancestries, Figures S1-S4 available in the online supplementary materials). Each plot presents significant  
173 associations as well as the direction of predictive effect. Because of the stringent correction for multiple testing, we  
174 included of interest  $q < 0.16$  associations, which would be significant with more traditional, liberal correction  
175 methods accounting for previously established effects.

176 Notable unexpected results included SZ GPS significantly predicting nicotine use, depression and anxiety  
177 symptoms, and family history of depression, anxiety, alcohol use disorder, and drug use. In addition, GPS for  
178 neuroticism (N) predicted a number of relevant psychiatric phenotypes, including neurotic, depression and anxiety  
179 symptoms.

#### 180 **Genetic Profile Score Prediction of the Phenome Across Non-European Ancestries**

181 As noted earlier, most discovery GWAS have used European samples, and while there is good evidence for  
182 cross-ancestral replication for some traits, the generalizability of many of these relationships transethnicly is not  
183 known. The diverse ancestry groups within S4S allowed cross-ancestral replication, and the use of continuous GPS  
184 metrics made the sample sizes available powerful enough to examine these hypotheses. A large proportion of the

185 strongest predictors observed in the EUR were replicated across the other ancestries, with a broadly similar pattern  
186 of results across all ancestry groups. While some outcome phenotypes were strongly predicted by GPS, a few  
187 outcome phenotypes, including physical activity, lifetime history of panic attack, age at first sexual intercourse, and  
188 bulimia nervosa were not predicted by any GPS in any ancestry group.

### 189 **GPS-GPS Correlations**

#### 190 *A Priori Hypothesis Testing and Global Cross-Disorder Genetic Profile Analyses*

191 Based on the cross-disorder psychiatric genomics findings to date, we had hypothesized significant GPS  
192 correlations between: SZ and BP, SZ and AUT, SZ and MDD, BP and MDD, and AUT and ADHD across each of  
193 the ancestry groups. *A priori* hypotheses (described in the Methods and listed in Table 2) of relationships between  
194 GPS scores were tested at a prior proportion level of 0.3. Figure 3 presents the results for GPS-GPS partial  
195 correlations at a GPS  $p = 0.3$ , and these results are presented because some phenotypes studied here (e.g., N) were  
196 not included in previous analyses. Finally, Figures S5-S8 (available in the online supplementary materials) present  
197 these correlations across four non-EUR ancestry groups. Notable unexpected correlations were also observed,  
198 including significant positive correlations of neuroticism GPS with GPSs for triglycerides and coronary artery  
199 disease. There is some overlap between the discovery samples for neuroticism and triglycerides, but no overlapping  
200 studies were included in the neuroticism and the coronary artery disease discovery samples. Therefore, the  
201 correlation of neuroticism and coronary artery disease is especially likely to reflect underlying genetic correlation  
202 between neuroticism and artery disease. Despite overlap in the discovery samples for the neuroticism and  
203 triglycerides polygenic scores, validation using LD score regression supported the existence of a genetic relationship  
204 between them ( $r_G = 0.53$ ;  $SE = 0.04$ ;  $p = 1.5 \times 10^{-36}$ ).

205

### 206 **Discussion**

207 The findings here present a wide-ranging and nuanced picture of major dimensions of vulnerability to  
208 psychopathology at a genetic level. This study includes substantial sample sizes of emerging adults, uses real-world  
209 outcome measures (with novel phenotypes in phenomic analyses; see Table S2 in the online supplement for details  
210 of assessment scales), includes a wide range of discovery GWAS, and is powerful enough to draw preliminary  
211 conclusions about several ancestries. Because this study does not look for “hits” in the traditional GWAS sense and



212 instead uses continuous GPS metrics, sample sizes provide adequate power across all separate ancestries in this  
213 study.

214           Importantly, results reflect relationships between anxiety, depressive, and schizophrenia-spectrum disorders  
215 that are largely consistent with current conceptualizations of diagnostic classification, and confirm the important  
216 involvement of a network of medical and risk phenotypes in genetic predisposition to these disorders. Informative  
217 genetic associations between medical and clinical phenotypes exist despite the relative dearth of individual loci of  
218 genome-wide significance.

219           We can learn a lot from the study of emerging adults relative to younger, adolescent samples, as more  
220 targeted theories about critical exposures and environmental risk factors can emerge. For example, GPS for SZ  
221 predicted anxiety, depression, nicotine use, experiences of interpersonal trauma, and family history of mental health  
222 problems. Importantly, these results expand on recent evidence that genetic risk for SZ can successfully predict  
223 diverse risk phenotypes such as anxiety and negative symptoms (Kendler *et al.* 1996; Fanous *et al.* 2001; Docherty  
224 & Sponheim, 2008; Docherty & Sponheim, 2014; Docherty *et al.* 2015; Jones *et al.* 2016; Kendler, 2016), and  
225 demonstrate important links between SZ genetic risk and health factors in early adulthood. Significant association of  
226 GPS with easily measured, specific risk factors (e.g., nicotine use, family history, trauma) indicates that GPS could  
227 be useful in predicting psychopathology, particularly in conjunction with environmental moderators.

228           The incorporation of personality traits such as N was also quite informative. For example, N GPS  
229 significantly predicted a broad network of general anxiety, phobia, panic, N, and depression phenotypes in S4S, as  
230 well as multiple health-related GPSs. This is consistent with previous biometrical and genomic research reporting  
231 significant relationships of N with MDD (Kendler & Myers, 2010; Genetics of Personality Consortium *et al.* 2015;  
232 Docherty *et al.* 2016), and preliminary findings from the UKBiobank suggesting a genetic overlap of neuroticism  
233 with cardiovascular health (Gale *et al.* 2016). Conversely, GPS for extraversion predicted decreased depressive  
234 symptoms, decreased anxiety symptoms, and decreased family history of mental health problems, though these  
235 associations did not remain significant after multiple testing correction. Associations pertaining to GPS for well-  
236 being in this sample are forthcoming from our research group.

237           Notable unexpected GPS-GPS results included positive correlations of N GPS with GPSs for coronary  
238 artery disease, which is likely to reflect underlying genetic correlation, as well as with triglycerides. This is the first  
239 study we know of to document significant positive genetic associations between N and cardiac health, despite the

240 high public health cost of N being well-documented (Cuijpers *et al.* 2010; cardiovascular risk and association with  
241 psychiatric phenotypes like N may be of special interest to public health efforts). Most of the GPS-GPS *a priori*  
242 relationships chosen for replication testing were represented in the same direction across all ancestry groups,  
243 corroborating previous efforts to map relationships between genetic risk profiles.

244         The abundance of significant relationships between intuitive combinations of GPSs and related outcomes is  
245 reassuring considering the many factors that could attenuate the statistical link between them. Association between a  
246 GPS and an outcome not only reflects correlation between the phenotype in the original ('discovery') GWAS that  
247 produced the statistics used to compute the GPS and the outcome phenotype, but is also related to a number of other  
248 factors. The link is limited by how accurately the GWAS measured the initial phenotype, how similar the discovery  
249 and test samples are (in age, ancestry composition, proportions of each sex, etc.), how well the test phenotype is  
250 measured by the data collection instrument, and how well it can incorporate indirect pathways from the genetic  
251 architectures to either phenotype.

252         For example, physical activity increases HDL levels (Kokkinos & Fernhall, 1999), so those who had higher  
253 HDL levels in the discovery GWAS (Teslovich *et al.* 2010) were likely a mix of those with innately high levels,  
254 those who engaged in higher levels of physical activity, and those with both traits. Therefore, HDL GPS perhaps  
255 indexes some propensity to engage in physical activity or other HDL-promoting behaviors, in addition to HDL  
256 metabolic variation such as a slower rate of HDL catabolism, which is thought to be the most common genetically  
257 determined mechanism of increased HDL levels in humans (Rader, 2006). The portion of the HDL GPS due to  
258 fitness behaviors may explain some of the polygenic association with the test phenotypes of BMI and weight.

259         There are a number of limitations to be aware of when interpreting these results. The synthesis of  
260 information from so many sources compounds any methodological and psychometric issues present in the original  
261 studies, so there is probable bias in multiple levels of the analysis that is difficult to measure. In order to maintain  
262 proximity with real outcomes, we did not transform our phenotypic variables to increase normality, but standardized  
263 the continuous variables computed from the participant responses to maintain comparable ranges of measurement.  
264 While LDpred performs adequately across ancestry groups, the accuracy in non-European ancestry groups is  
265 attenuated to the degree that multiple causal variants fall in regions where LD patterns differ transethnically. In  
266 addition, a recent pre-print (Martin *et al.* 2016) shows biased predictions in several different populations using GPS  
267 for phenotypes that are also used in this paper (for example, Type 2 diabetes and SZ).

268 Overall, this broader picture of genetic vulnerability has important implications for how we study risk and  
269 resilience in emerging adulthood. While the variance explained by any of these GPSs is small, they provide easily  
270 accessible information to guide future prediction, prevention, and intervention efforts to improve health and quality  
271 of life outcomes. Future longitudinal and intervention research could elaborate on this atlas to examine the  
272 predictive validity and prevention utility of many of the phenotypes here, such as N, family history, trauma, and  
273 nicotine use. Future polygenic work would also benefit from GPSs based on non-European ancestry groups when  
274 such summary statistics are available. Phenome-wide research utilizing deeper phenotyping methods will likely  
275 further enhance results, and thus future prediction of positive and negative health outcomes.

276 Finally, the relationships outlined here provide implicit suggestions for studies of the causal structure of the  
277 GPS phenotypes themselves. The genetic architecture of most of the traits and disorders in the atlas display  
278 substantial overlap; a significant portion of genetic variation involved in the etiology of these constructs does not  
279 selectively contribute to risk for one phenotype as we know it, but rather has effects that act on some axis of liability  
280 that increases the likelihood of many phenotypes. Analyzing multiple related phenotypes in a holistic fashion allows  
281 elucidation of the individual patterns of genetic and environmental factors that may explain causal mechanisms—  
282 which risk factors they share, and which are unique to one phenotype, thus serving to refine our nosological theories.  
283 Any epidemiological analysis is limited if the construct under study is not a uniform disease entity, but as  
284 characterization of constructs improves, the power to find their correlates does as well. The better we ask the  
285 questions, the more useful the answers become, for both clinical and scientific purposes.

286

287

**Author Contributions**

288

A. R. Docherty, A. Moscati, and K. S. Kendler developed the study concept. A. Moscati, J. E. Savage, J. E.

289

Salvatore, and M. Cooke contributed to psychometric analyses and data collection. D. Dick and K. S. Kendler

290

oversaw data collection. A. Moscati and A. R. Docherty performed the data analysis and interpretation under the

291

supervision of B. T. Webb, S. A. Bacanu, D. E. Adkins, F. Aliev, A. C. Edwards, and B. P. Riley. A. R. Docherty

292

and A. Moscati drafted the manuscript, and K. Kendler, A. C. Edwards, J. E. Savage, J. E., Salvatore, M. Cooke, B.

293

T. Webb, S. A. Bacanu, D. E. Adkins, A. Moore, R. Peterson, and D. Dick provided edits. All authors approved the

294

final version of the manuscript for submission.

295

296

**Acknowledgements**

297 We would like to thank the participants and the many VCU faculty, students, and staff who contributed to the design

298 and implementation of this project.

299

300

### **Financial Disclosures**

301 All authors declare no conflict of interest with respect to the authorship or publication of this article. Data collection

302 for the study was funded by R37AA011408, P20AA107828, K02AA018755, and P50AA022537 from the National

303 Institute on Alcohol Abuse and Alcoholism, by Virginia Commonwealth University, and by UL1RR031990 from

304 the National Center for Research Resources and National Institutes of Health Roadmap for Medical Research. A.

305 Docherty was funded by K01MH109765 from the National Institute of Mental Health, and by a Brain & Behavior

306 Research Foundation (formerly NARSAD) Young Investigator Award. A. Moscatti, A. Moore were supported by

307 institutional training grant T32MH20030. J. Salvatore was supported by F32AA22269 and K01AA024152. M.

308 Cooke received support from UL1TR000058 from the National Institutes of Health National Center for Advancing

309 Translational Science. A. Edwards was supported by K01AA021399.

310

311

312

### **Declaration of Interest**

313 Authors report no conflicts of interest.

314

314  
315  
316  
317  
318  
319  
320  
321  
322  
323  
324  
325  
326  
327  
328  
329  
330  
331  
332  
333  
334  
335  
336  
337  
338  
339  
340  
341

## References

- Akaike H** (1974). A new look at the statistical model identification. *IEEE Transactions on Automatic Control* **19**, 716-723.
- American Psychiatric Association.** (2000). *Diagnostic and Statistical Manual of Mental Disorder* (4th ed.). Washington, DC: American Psychiatric Association
- American Psychiatric Association.** (2013). *Diagnostic and Statistical Manual of Mental Disorders* (5th ed.). Arlington, VA: American Psychiatric Association.
- Benyamin B, Pourcain B, Davis OS, Davies G, Hansell NK, Brion MJ, . . . Visscher PM** (2014). Childhood intelligence is heritable, highly polygenic and associated with FBNP1L. *Molecular Psychiatry* **19**, 253-258.
- Benjamini Y, Hochberg Y** (1995). Controlling the false discovery rate: A practical and powerful approach to multiple testing. *Journal of the Royal Statistical Society. Series B (Methodological)* **57**, 289-300.
- Brener ND, Kann L, Kinchen SA, Grunbaum JA, Whalen L, Eaton D, . . . Ross JG** (2004). Methodology of the youth risk behavior surveillance system. *MMWR Recommendations and Reports* **53**, 1-13.
- Brown KW, Ryan RM** (2003). The benefits of being present: Mindfulness and its role in psychological well-being. *Journal of Personality and Social Psychology* **84**, 822-848.
- Bucholz KK, Cadoret R, Cloninger CR, Dinwiddie SH, Hesselbrock VM, Nurnberger JI, Schuckit MA** (1994). A new, semi-structured psychiatric interview for use in genetic linkage studies: A report on the reliability of the SSAGA. *Journal of Studies on Alcohol* **55**, 149-158.
- Bulik-Sullivan B, Finucane HK, Anttila V, Gusev A, Day FR, Loh PR, . . . Neale BM** (2015). An atlas of genetic correlations across human diseases and traits. *Nature Genetics* **47**, 1236-1241.
- Buyse DJ, Reynolds CF, Monk TH, Berman SR, Kupfer DJ** (1989). The Pittsburgh Sleep Quality Index: A new instrument for psychiatric practice and research. *Psychiatry Research* **28**, 193-213.
- Connor KM, Davidson JR** (2003). Development of a new resilience scale: The Connor-Davidson Resilience Scale (CD-RISC). *Depression and Anxiety* **18**, 76-82.

- 342 **Craig CL, Marshall AL, Sjostrom M, Bauman AE, Booth ML, Ainsworth BE, . . . Oja P** (2003). International  
343 physical activity questionnaire: 12-country reliability and validity. *Medicine & Science in Sports &*  
344 *Exercise* **35**, 1381-1395.
- 345 **Cross-Disorder Group of the Psychiatric Genomics Consortium** (2013). Identification of risk loci with shared  
346 effects on five major psychiatric disorders: A genome-wide analysis. *Lancet* **381**, 1371-1379.
- 347 **Cuijpers P, Smit F, Penninx BW, de Graaf R, ten Have M, Beekman AT** (2010). Economic costs of  
348 neuroticism: A population-based study. *Archives of General Psychiatry* **67**, 1086-1093.
- 349 **Derogatis LR, Cleary PA** (1977). Confirmation of the dimensional structure of the SCL-90: A study in construct  
350 validation. *Journal of Clinical Psychology* **33**, 981-989.
- 351 **Dick DM, Nasim A, Edwards AC, Salvatore JE, Cho SB, Adkins A, . . . Kendler KS** (2014). Spit for Science:  
352 Launching a longitudinal study of genetic and environmental influences on substance use and emotional  
353 health at a large US university. *Frontiers in Genetics* **5**, 47.
- 354 **Docherty AR, Moscati AA, Fanous AH** (2016). Cross-disorder psychiatric genomics: A review. *Current*  
355 *Behavioral Neuroscience Reports* **3**, 256-263.
- 356 **Docherty AR, Moscati A, Peterson R, Edwards AC, Bigdeli TB, Adkins DE, . . . Kendler KS** (2016). SNP-  
357 based heritability estimates of the personality dimensions and polygenic prediction of both neuroticism and  
358 major depression: Findings from CONVERGE. *Translational Psychiatry* **6**, e926.
- 359 **Docherty AR, Sponheim SR** (2008). Anhedonia as a phenotype for the Val158Met COMT polymorphism in  
360 relatives of patients with schizophrenia. *Journal of Abnormal Psychology* **117**, 788-798.
- 361 **Docherty AR, Sponheim SR** (2014). Anhedonia as an indicator of genetic liability to schizophrenia. In M. Ritsner  
362 (Ed.), *Anhedonia: A Comprehensive Handbook*. Dordrecht: Springer.
- 363 **Docherty AR, Sponheim SR, Kerns JG** (2015). Self-reported affective traits and current affective experiences of  
364 biological relatives of people with schizophrenia. *Schizophrenia Research* **161**, 340-344.
- 365 **Fanous A, Gardner C, Walsh D, Kendler KS** (2001). Relationship between positive and negative symptoms of  
366 schizophrenia and schizotypal symptoms in nonpsychotic relatives. *Archives of General Psychiatry* **58**,  
367 669-673.
- 368 **Fisher RA** (1919). On the correlation between relatives on the supposition of mendelian inheritance. *Transactions*  
369 *of the Royal Society of Edinburgh: Earth and Environmental Science* **52**, 399-433.



- 370 **Gale CR, Hagenaars SP, Davies G, Hill WD, Liewald DC, Cullen B, . . . Harris SE** (2016). Pleiotropy between  
371 neuroticism and physical and mental health: Findings from 108,038 men and women in UK Biobank.  
372 *Translational Psychiatry* **6**, e791.
- 373 **Genetics of Personality Consortium, de Moor MH, van den Berg SM, Verweij KJ, Krueger RF, Luciano M, . .**  
374 **. Boomsma DI** (2015). Meta-analysis of genome-wide association studies for neuroticism, and the  
375 polygenic association with major depressive disorder. *JAMA Psychiatry* **72**, 642-650.
- 376 **Gray MJ, Litz BT, Hsu JL, Lombardo TW** (2004). Psychometric properties of the life events checklist.  
377 *Assessment* **11**, 330-341.
- 378 **Hagenaars SP, Harris SE, Davies G, Hill WD, Liewald DC, Ritchie SJ, . . . Deary IJ** (2016). Shared genetic  
379 aetiology between cognitive functions and physical and mental health in UK Biobank (N=112 151) and 24  
380 GWAS consortia. *Molecular Psychiatry* **21**, 1624-1632.
- 381 **Hays RD, Sherbourne CD, Mazel RM** (1995). *User's manual for the Medical Outcomes Study (MOS): Core*  
382 *measures of health-related quality of life*. Santa Monica, CA: RAND.
- 383 **Heatherton TF, Kozlowski LT, Frecker RC, Fagerstrom KO** (1991). The Fagerstrom Test for Nicotine  
384 Dependence: A revision of the Fagerstrom Tolerance Questionnaire. *British Journal of Addiction* **86**, 1119-  
385 1127.
- 386 **Hendrick SS** (1988). A generic measure of relationship satisfaction. *Journal of Marriage and Family* **50**, 93-98.
- 387 **Hibar DP, Stein JL, Renteria ME, Arias-Vasquez A, Desrivieres S, Jahanshad N, . . . Medland SE** (2015).  
388 Common genetic variants influence human subcortical brain structures. *Nature* **520**, 224-229.
- 389 **Horikoshi M, Yaghoobkar H, Mook-Kanamori DO, Sovio U, Taal HR, Hennig BJ, . . . Freathy RM** (2013):  
390 New loci associated with birth weight identify genetic links between intrauterine growth and adult height  
391 and metabolism. *Nature Genetics* **45**, 76-82.
- 392 **John OP, Srivastava S** (1999). The Big-Five trait taxonomy: History, measurement, and theoretical perspectives. In  
393 L. A. Pervin (Ed.), *Handbook of Personality: Theory and Research* (pp. 102-183). New York: Guilford  
394 Press.
- 395 **Jones HJ, Stergiakouli E, Tansey KE, Hubbard L, Heron J, Cannon M, . . . Zammit S** (2016). Phenotypic  
396 manifestation of genetic risk for schizophrenia during adolescence in the general population. *JAMA*  
397 *Psychiatry* **73**, 221-228.

- 398 **Jostins L, Ripke S, Weersma RK, Duerr RH, McGovern D, Hui KY, . . . Cho JH** (2012). Host-microbe  
399 interactions have shaped the genetic architecture of inflammatory bowel disease. *Nature* **491**, 119-124.
- 400 **Kendler KS** (2016). The schizophrenia polygenic risk score: To what does it predispose in adolescence? *JAMA*  
401 *Psychiatry* **73**, 193-194.
- 402 **Kendler KS, Gardner CO, Prescott CA** (1997). Religion, psychopathology, and substance use and abuse; A  
403 multimeasure, genetic-epidemiologic study. *American Journal of Psychiatry* **154**, 322-329.
- 404 **Kendler KS, Jacobson K, Myers JM, Eaves LJ** (2008). A genetically informative developmental study of the  
405 relationship between conduct disorder and peer deviance in males. *Psychological Medicine* **38**, 1001-1011.
- 406 **Kendler KS, Karkowski LM, Prescott CA** (1999) Causal relationship between stressful life events and the onset  
407 of major depression. *American Journal of Psychiatry* **156**, 837-841.
- 408 **Kendler KS, Karkowski-Shuman L, Walsh D** (1996). The risk for psychiatric illness in siblings of  
409 schizophrenics: The impact of psychotic and non-psychotic affective illness and alcoholism in parents. *Acta*  
410 *Psychiatrica Scandinavica* **94**, 49-55.
- 411 **Kendler KS, Myers J** (2010). The genetic and environmental relationship between major depression and the five-  
412 factor model of personality. *Psychological Medicine* **40**, 801-806.
- 413 **Kendler KS, Prescott CA** (1999). Caffeine intake, tolerance, and withdrawal in women: A population-based twin  
414 study. *American Journal of Psychiatry* **156**, 223-228.
- 415 **Kessler RC, Angermeyer M, Anthony JC, de Graaf R, Demyttenaere K, Gasquet I, . . . Ustun TB** (2007):  
416 Lifetime prevalence and age-of-onset distributions of mental disorders in the World Health Organization's  
417 World Mental Health Survey Initiative. *World Psychiatry* **6**, 168-176.
- 418 **Kessler RC, Berglund P, Demler O, Jin R, Merikangas KR, Walters EE** (2005). Lifetime prevalence and age-  
419 of-onset distributions of DSM-IV disorders in the National Comorbidity Survey Replication. *Archives of*  
420 *General Psychiatry* **62**, 593-602.
- 421 **Kokkinos PF, Fernhall B** (1999). Physical activity and high density lipoprotein cholesterol levels: What is the  
422 relationship? *Sports Medicine* **28**, 307-314.
- 423 **Krapohl E, Euesden J, Zabaneh D, Pingault JB, Rimfeld K, von Stumm S, . . . Plomin R** (2015). Phenome-  
424 wide analysis of genome-wide polygenic scores. *Molecular Psychiatry* **21**, 1188-1193.

- 425 **Lambert JC, Ibrahim-Verbaas CA, Harold D, Naj AC, Sims R, Bellenguez C, . . . Amouyel P** (2013). Meta-  
426 analysis of 74,046 individuals identifies 11 new susceptibility loci for Alzheimer's disease. *Nature Genetics*  
427 **45**, 1452-1458.
- 428 **Locke AE, Kahali B, Berndt SI, Justice AE, Pers TH, Day FR, . . . Speliotes EK** (2015). Genetic studies of body  
429 mass index yield new insights for obesity biology. *Nature* **518**, 197-206.
- 430 **Lynam DR, Smith GT, Whiteside SP, Cyders MA** (2006). *The UPPS-P: Assessing five personality pathways to*  
431 *impulsive behavior. Technical report*. West Lafayette, IN: Purdue University.
- 432 **Major Depressive Disorder Working Group of the Psychiatric Genomics Consortium** (2013). A mega-analysis  
433 of genome-wide association studies for major depressive disorder. *Molecular Psychiatry* **18**, 497-511.
- 434 **Marigorta UM, Navarro A** (2013): High trans-ethnic replicability of GWAS results implies common causal  
435 variants. *PLoS Genetics* **9**, e1003566.
- 436 **Martin AR, Gignoux CR, Walters RK, Wojcik GL, Grave S, Daly MJ, . . . Kenny EE** (2016). Population  
437 genetic history and polygenic risk biases in 1000 genomes. Unpublished manuscript. Available at:  
438 <http://biorxiv.org/content/early/2016/08/23/070797>
- 439 **Morris AP, Voight BF, Teslovich TM, Ferreira T, Segre AV, Steinthorsdottir V, . . . McCarthy MI** (2012).  
440 Large-scale association analysis provides insights into the genetic architecture and pathophysiology of type  
441 2 diabetes. *Nature Genetics* **44**, 981-990.
- 442 **Neale BM, Medland SE, Ripke S, Asherson P, Franke B, Lesch KP, . . . Nelson, S** (2010). Meta-analysis of  
443 genome-wide association studies of attention-deficit/hyperactivity disorder. *Journal of the American*  
444 *Academy of Child and Adolescent Psychiatry* **49**, 884-897.
- 445 **Okbay A, Baselmans BM, de Neve JE, Turley P, Nivard MG, Fontana MA, . . . Cesarini D** (2016). Genetic  
446 variants associated with subjective well-being, depressive symptoms, and neuroticism identified through  
447 genome-wide analyses. *Nature Genetics* **48**, 624-633.
- 448 **Otowa T, Hek K, Lee M, Byrne EM, Mirza SS, Nivard MG, . . . Hetttema JM** (2016) Meta-analysis of genome-  
449 wide association studies of anxiety disorders. *Molecular Psychiatry* **21**, 1391-1399.
- 450 **Perry JR, Day F, Elks CE, Sulem P, Thompson DJ, Ferreira T, . . . Ong KK** (2014). Parent-of-origin-specific  
451 allelic associations among 106 genomic loci for age at menarche. *Nature* **514**, 92-97.

- 452 **Psychiatric GWAS Consortium Bipolar Disorder Working Group** (2011). Large-scale genome-wide association  
453 analysis of bipolar disorder identifies a new susceptibility locus near ODZ4. *Nature Genetics* **43**, 977-983.
- 454 **Rader DJ** (2006). Molecular regulation of HDL metabolism and function: Implications for novel therapies. *The*  
455 *Journal of Clinical Investigation* **116**, 3090-3100.
- 456 **Rietveld CA, Medland SE, Derringer J, Yang J, Esko T, Martin NW, . . . Koellinger PD** (2013). GWAS of  
457 126,559 individuals identifies genetic variants associated with educational attainment. *Science* **340**, 1467-  
458 1471.
- 459 **Schizophrenia Working Group of the Psychiatric Genomics Consortium** (2014). Biological insights from 108  
460 schizophrenia-associated genetic loci. *Nature* **511**, 421-427.
- 461 **Schuckit MA, Smith TL, Tipp JE** (1997). The Self-Rating of the Effects of alcohol (SRE) form as a retrospective  
462 measure of the risk for alcoholism. *Addiction* **92**, 979-988.
- 463 **Schunkert H, Konig IR, Kathiresan S, Reilly MP, Assimes TL, Holm H, . . . Samani NJ** (2011). Large-scale  
464 association analysis identifies 13 new susceptibility loci for coronary artery disease. *Nature Genetics* **43**,  
465 333-338.
- 466 **Shungin D, Winkler TW, Croteau-Chonka DC, Ferreira T, Locke AE, Magi R, . . . Mohlke KL** (2015). New  
467 genetic loci link adipose and insulin biology to body fat distribution. *Nature* **518**, 187-196.
- 468 **Stahl EA, Raychaudhuri S, Remmers EF, Xie G, Eyre S, Thomson BP, . . . Plenge RM** (2010). Genome-wide  
469 association study meta-analysis identifies seven new rheumatoid arthritis risk loci. *Nature Genetics* **42**,  
470 508-514.
- 471 **Steinberg L, Lamborn SD, Dornbusch SM, Darling N** (1992). Impact of parenting practices on adolescent  
472 achievement: Authoritative parenting, school involvement, and encouragement to succeed. *Child*  
473 *Development* **63**, 1266-1281.
- 474 **Taal HR, St Pourcain B, Thiering E, Das S, Mook-Kanamori DO, Warrington NM, . . . Early Growth**  
475 **Genetics Consortium** (2012). Common variants at 12q15 and 12q24 are associated with infant head  
476 circumference. *Nature Genetics* **44**, 532-538.
- 477 **Teslovich TM, Musunuru K, Smith AV, Edmondson AC, Stylianou IM, Koseki M, . . . Kathiresan S** (2010).  
478 Biological, clinical and population relevance of 95 loci for blood lipids. *Nature* **466**, 707-713.

- 479 **Tobacco and Genetics Consortium** (2010). Genome-wide meta-analyses identify multiple loci associated with  
480 smoking behavior. *Nature Genetics* **42**, 441-447.
- 481 **van der Valk RJ, Kreiner-Moller E, Kooijman MN, Guxens M, Stergiakouli E, Saaf A, . . . Jaddoe VW**  
482 (2015). A novel common variant in DCST2 is associated with length in early life and height in adulthood.  
483 *Human Molecular Genetics* **24**, 1155-1168.
- 484 **van den Berg SM, de Moor MH, Verweij KJ, Krueger RF, Luciano M, Arias Vasquez A, . . . Boomsma DI**  
485 (2016). Meta-analysis of genome-wide association studies for extraversion: Findings from the genetics of  
486 personality consortium. *Behavior Genetics* **46**, 170-182.
- 487 **Vilhjálmsón BJ, Yang J, Finucane HK, Gusev A, Lindstrom S, Ripke S, . . . Price AL** (2015). Modeling  
488 linkage disequilibrium increases accuracy of polygenic risk scores. *American Journal of Human Genetics*  
489 **97**, 576-592.
- 490 **Wood AR, Esko T, Yang J, Vedantam S, Pers TH, Gustafsson S, Frayling TM** (2014). Defining the role of  
491 common variation in the genomic and biological architecture of adult human height. *Nature Genetics* **46**,  
492 1173-1186.  
493

GENOME-PHENOME PREDICTION IN EMERGING ADULTHOOD

**Table 1. Phenotype Prediction at .3 GPS: Tests of *A Priori* Associations Based on Previous Research**

| Discovery Phenotype        | Test Phenotype | Previous Finding                                  | Sign of Coefficient | Other Observed Associations                                                                                                                                                                                                                        |
|----------------------------|----------------|---------------------------------------------------|---------------------|----------------------------------------------------------------------------------------------------------------------------------------------------------------------------------------------------------------------------------------------------|
| Age at Menarche            | BMI/Obesity    | - (Bulik-Sullivan et al., 2015)                   | -***                | -Weight*, +Extraversion*                                                                                                                                                                                                                           |
|                            | Height         | + (Bulik-Sullivan et al., 2015)                   | +*                  |                                                                                                                                                                                                                                                    |
| Alzheimer's Disease        | GPA            | - Educational Attainment (Hagenaars et al., 2016) | +                   | None                                                                                                                                                                                                                                               |
| Anorexia                   | BMI/Obesity    | - (Bulik-Sullivan et al., 2015)                   | -                   | None                                                                                                                                                                                                                                               |
| Attention Deficit Disorder | GPA            | - Educational Attainment (Hagenaars et al., 2016) | -                   | -Parental Education*                                                                                                                                                                                                                               |
| Autism                     | GPA            | + Educational Attainment (Hagenaars et al., 2016) | -                   | +Parental Education*                                                                                                                                                                                                                               |
| Bipolar Disorder           | Depression     | + MDD (Bulik-Sullivan et al., 2015)               | +                   | -BMI**, -Weight***, +Family History for Alcohol*, Drug use**, and Depression/Anxiety**                                                                                                                                                             |
|                            | GPA            | + Educational Attainment (Hagenaars et al., 2016) | +                   |                                                                                                                                                                                                                                                    |
| Birth Height               | Height         | + (Bulik-Sullivan et al., 2015)                   | ****                | None                                                                                                                                                                                                                                               |
| Birth Weight               | Height         | + (Bulik-Sullivan et al., 2015)                   | +                   | None                                                                                                                                                                                                                                               |
| Body Mass Index            | BMI            | + (Krapohl et al., 2015)                          | ****                | +Weight***, +Subjective Response to Ethanol***, -GAD Screener*                                                                                                                                                                                     |
|                            | GPA            | - Educational Attainment (Hagenaars et al., 2016) | -                   |                                                                                                                                                                                                                                                    |
| Child IQ                   | GPA            | + Cognitive Ability (Krapohl et al., 2015)        | +                   | None                                                                                                                                                                                                                                               |
| College                    | BMI/Obesity    | - (Bulik-Sullivan et al., 2015)                   | -                   | -Subjective Response to Ethanol*, -Conscientiousness*, +Parental Education***                                                                                                                                                                      |
|                            | Cigarette Use  | - Ever smoker (Bulik-Sullivan et al., 2015)       | +                   |                                                                                                                                                                                                                                                    |
|                            | GPA            | + Cognitive Ability (Krapohl et al., 2015)        | +*                  |                                                                                                                                                                                                                                                    |
| Coronary Artery Disease    | GPA            | - Educational Attainment (Hagenaars et al., 2016) | -                   | None                                                                                                                                                                                                                                               |
|                            | Height         | -                                                 | -                   |                                                                                                                                                                                                                                                    |
| Ever Smoker                | BMI/Obesity    | + (Bulik-Sullivan et al., 2015)                   | +                   | +Antisocial High School Behavior*                                                                                                                                                                                                                  |
| Height                     | GPA            | + Educational Attainment (Hagenaars et al., 2016) | -                   | -BMI**, +Weight***                                                                                                                                                                                                                                 |
|                            | Height         | + (Krapohl et al., 2015)                          | ****                |                                                                                                                                                                                                                                                    |
| Infant Head Circumference  | Height         | + (Bulik-Sullivan et al., 2015)                   | +                   | None                                                                                                                                                                                                                                               |
| Intracranial Volume        | GPA            | + Educational Attainment (Hagenaars et al., 2016) | -                   | None                                                                                                                                                                                                                                               |
| Major Depressive Disorder  | GPA            | Null (Hagenaars et al., 2016)                     | Null                | +Depressive symptoms**, +Neuroticism*, +GAD Screener*, +Specific Phobia Screener*, +Family History for Alcohol***, and Depression/Anxiety***                                                                                                       |
| Schizophrenia              | Depression     | + MDD (Bulik-Sullivan et al., 2015)               | ***                 | +Alcohol Use Disorder Symptoms*, +Anxiety Symptoms***, +Neuroticism*, +Interpersonal Trauma***, +PTSD Screener*, +Ever Use Nicotine*, +GAD Screener*, +Social Phobia Screener*, +Family History of Alcohol*, Drug Use**, and Depression/Anxiety*** |
|                            | Cigarette Use  | Null, Ever Smoker (Bulik-Sullivan et al., 2015)   | ***                 |                                                                                                                                                                                                                                                    |
|                            | GPA            | + Educational Attainment (Hagenaars et al., 2016) | -                   |                                                                                                                                                                                                                                                    |
| Type 2 Diabetes            | GPA            | Null (Hagenaars et al., 2016)                     | Null                | None                                                                                                                                                                                                                                               |

Note: \* =  $q < 0.16$ , \*\* =  $q < 0.05$ , \*\*\* =  $q < 0.01$ . BMI = body mass index; GPA = grade point average; GAD = generalized anxiety disorder; MDD = major depressive disorder; PTSD = posttraumatic stress disorder; S4S = Spit for Science.

**Table 2. Cross-Ancestry Replication Tests of European GPS-GPS Correlations Based on Atlas from Bulik-Sullivan et al., 2015**

| Discovery Phenotype       | Previous Finding<br>(Bulik-Sullivan et al., 2015)            | Significant Replication in Spit for Science                                                  |
|---------------------------|--------------------------------------------------------------|----------------------------------------------------------------------------------------------|
| Age at Menarche           | +Height, +HDL                                                | +Height**** +HDL**                                                                           |
| Alzheimer's               | -College                                                     | -College*                                                                                    |
| Anorexia                  | +Schizophrenia                                               | +Schizophrenia****                                                                           |
| Bipolar Disorder          | +College, +Schizophrenia, +Major Depression                  | +College****, +Schizophrenia****, +Major Depression****                                      |
| Birth Weight              | -Type 2 Diabetes, +Infant Head Circumference                 | -Type 2 Diabetes* (+ in EAS and SAS), +Infant Head Circumference****                         |
| College                   | -Ever Smoked, -Triglycerides, -Coronary Artery Disease, +HDL | -Ever Smoked*, -Triglycerides****, -Coronary Artery Disease**** (+ in AMR and EAS), +HDL**** |
| Coronary Artery Disease   | +Type 2 Diabetes, +Triglycerides                             | +Type 2 Diabetes****, +Triglycerides****                                                     |
| Crohn's                   | +Ulcerative Colitis                                          | +Ulcerative Colitis****                                                                      |
| HDL                       | -Type 2 Diabetes, -Waist Hip Ratio, -Triglycerides           | -Type 2 Diabetes****, -Waist Hip Ratio****, -Triglycerides****                               |
| Height                    | +Infant Head Circumference                                   | +Infant Head Circumference****                                                               |
| LDL                       | +Triglycerides                                               | +Triglycerides****                                                                           |
| Major Depressive Disorder | +Schizophrenia                                               | +Schizophrenia****                                                                           |

Note: \*\*\*\* = q-value < 0.0001, \*\*\* = q-value < 0.001, \*\* = q-value < 0.01, \* = q-value < 0.05.

494  
495  
496  
497  
498  
499  
500  
501  
502  
503  
504  
505  
506  
507  
508  
509  
510  
511  
512  
513  
514  
515  
516  
517  
518  
519  
520  
521

522  
523  
524

## Figures

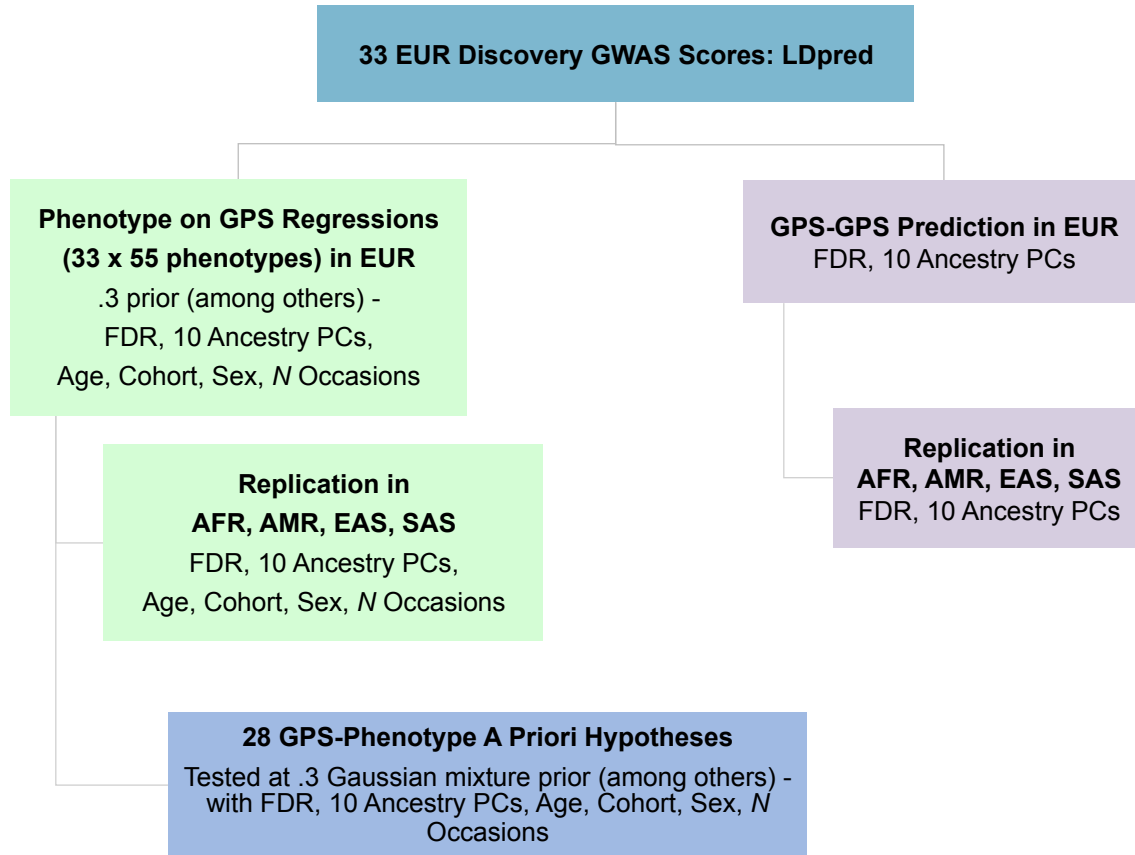

525

526 **Fig. 1. Flow Chart of the GPS-Phenome and GPS-GPS Analyses.** GWAS = genome wide association study;

527 FDR = false discovery rate; GPS = genome-wide polygenic score; PC = principal component.

528

529



GENOME-PHENOME PREDICTION IN EMERGING ADULTHOOD

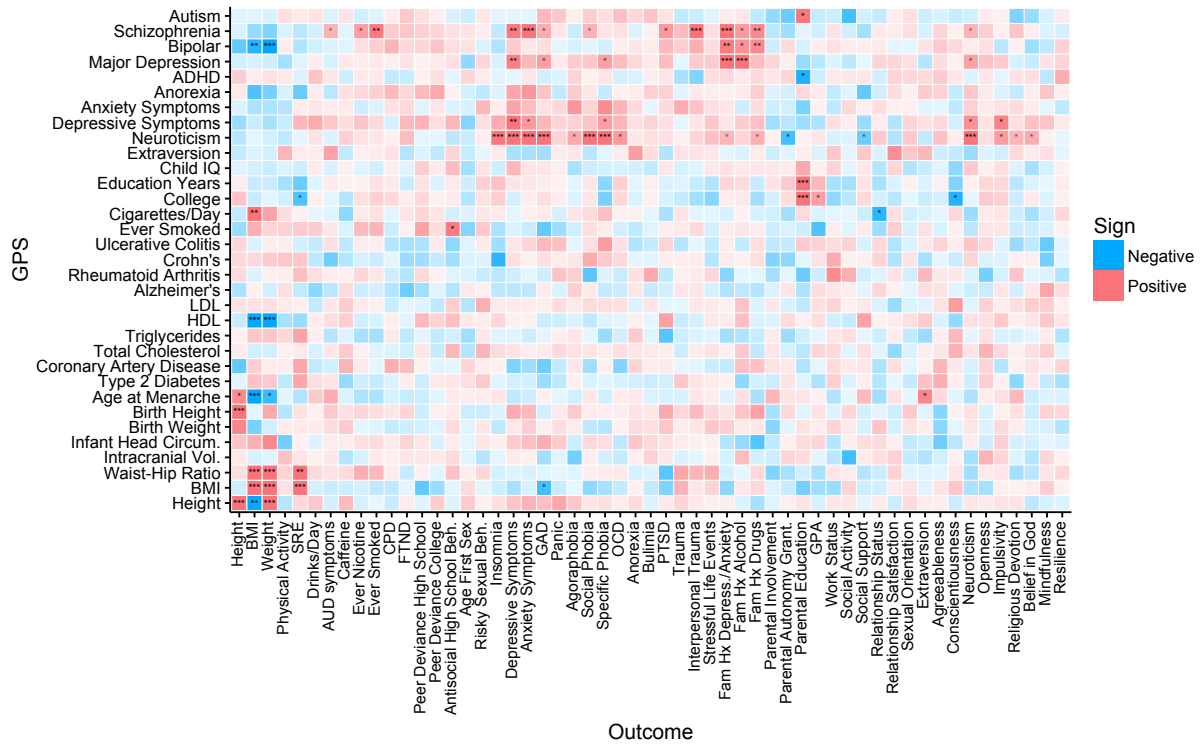

530

531 **Fig. 2. GPS on phenome regression q-values at GPS with prior proportion of causal effects = 0.3. Here,**

532 asterisks in the cells of the heatmap denote results of greater effect: \*\*\* = q-value < .01, \*\* = q-value < .05, \* = q-

533 value < .16. Blue values reflect a negative association, and red reflect positive association. Intensity of color

534 indicates  $-\log_{10} p$ -value.

535

536

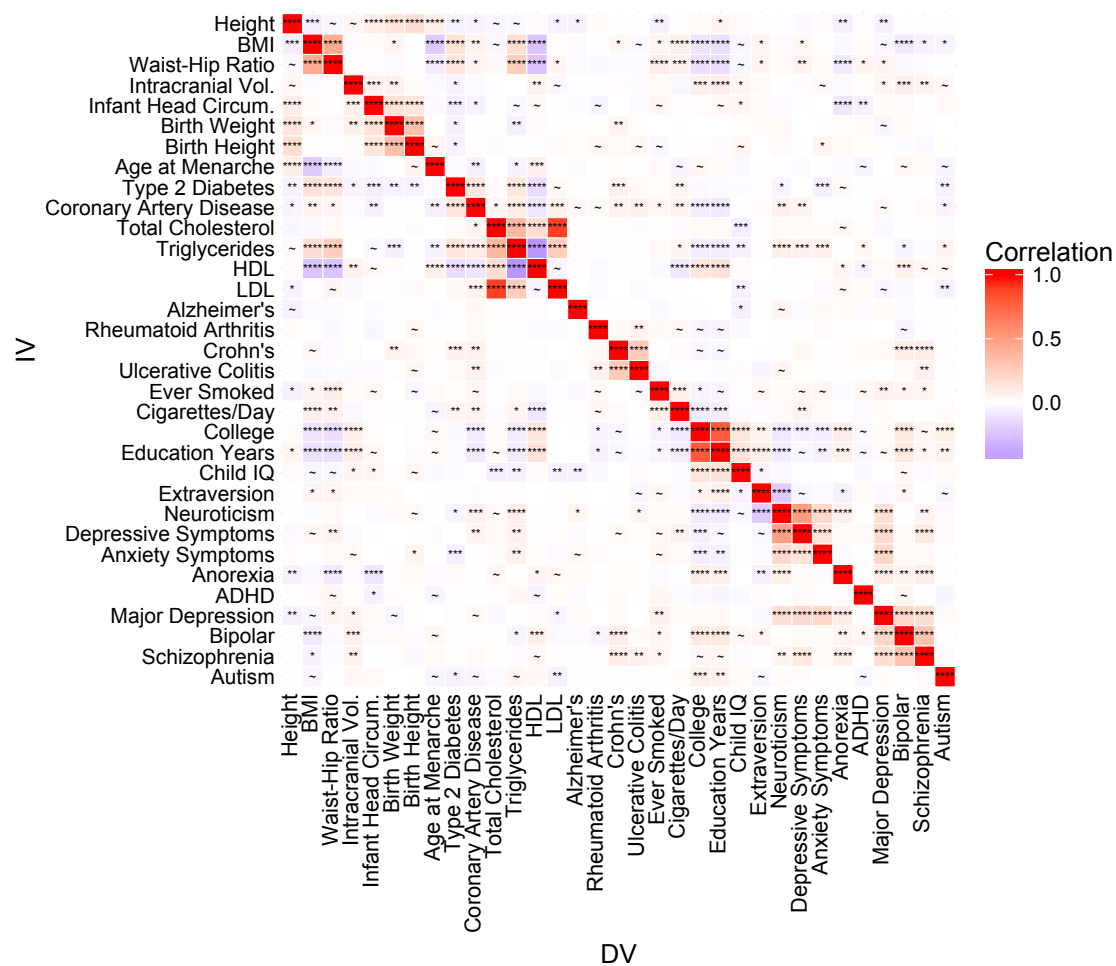

537

538 **Fig. 3. Genetic Overlap and Co-Heritability of GPS in European Sample (EUR).** Heatmap of partial correlation

539 coefficients between GPS with prior proportion of causal effects = 0.3. Here, asterisks in the cells of the heatmap

540 denote results of greater effect: \*\*\*\* = q-value < 0.0001, \*\*\* = q-value < 0.001, \*\* = q-value < 0.01, \* = q-value <

541 0.05, and ~ = suggestive significance at q-value < 0.16. Blue values reflect a negative correlation, and red reflect

542 positive correlation.

543
